# Supplementary material for: Application of Surfactant Modified Natural Zeolites for the Removal of Salicylic Acid—A Contaminant of Emerging Concern
Source: MDPI journal article supplement (doi:10.3390/ma14247728), 2021-12-14
Supplement: s1 [file s1]

## Supplementary Materials

# Application of Surfactant Modified Natural Zeolites for the Removal of Salicylic Acid—A Contaminant of Emerging Concern

Danijela Smiljanić <sup>1,\*</sup>, Aleksandra Daković <sup>1</sup>, Milena Obradović <sup>1</sup>, Milica Ožegović <sup>1</sup>, Francesco Izzo <sup>2</sup>, Chiara Germinario <sup>3</sup>, and Bruno de Gennaro <sup>4</sup>

<sup>1</sup> Institute for Technology of Nuclear and Other Mineral Raw Materials, Franche D' Epere 86, 11000 Belgrade, Serbia; a.dakovic@itnms.ac.rs (A.D.); m.obradovic@itnms.ac.rs (M.O.); m.spasojevic@itnms.ac.rs (M.O.)

<sup>2</sup> Department of Earth Sciences, Environment and Resources, Federico II University, Via Cinthia, 80126 Napoli, Italy; francesco.izzo4@unina.it

<sup>3</sup> Department of Science and Technology, University of Sannio, Via F. De Sanctis, 82100 Benevento, Italy; chiara.germinario@unisannio.it

<sup>4</sup> Department of Chemical, Materials and Production Engineering, Federico II University, Piazzale V. Tecchio 80, 80125 Naples, Italy; bruno.degennaro@unina.it

\* Correspondence: d.smiljanic@itnms.ac.rs

**Citation:** Smiljanić, D.; Daković, A.; Obradović, M.; Ožegović, M.; Izzo, F.; Germinario, C.; de Gennaro, B. Application of Surfactant Modified Natural Zeolites for the Removal of Salicylic Acid—A Contaminant of Emerging Concern. *Materials* **2021**, *14*, 7728. <https://doi.org/10.3390/ma14247728>

## The Addition to the Section:

### 3.1. The Point of Zero Charge ( $pH_{pzc}$ )

Academic Editor: Lucjan Chmielarz

Received: 29 October 2021

Accepted: 10 December 2021

Published: 14 December 2021

**Publisher's Note:** MDPI stays neutral with regard to jurisdictional claims in published maps and institutional affiliations.

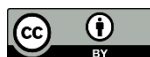

**Copyright:** © 2021 by the authors. Licensee MDPI, Basel, Switzerland. This article is an open access article distributed under the terms and conditions of the Creative Commons Attribution (CC BY) license (<http://creativecommons.org/licenses/by/4.0/>).

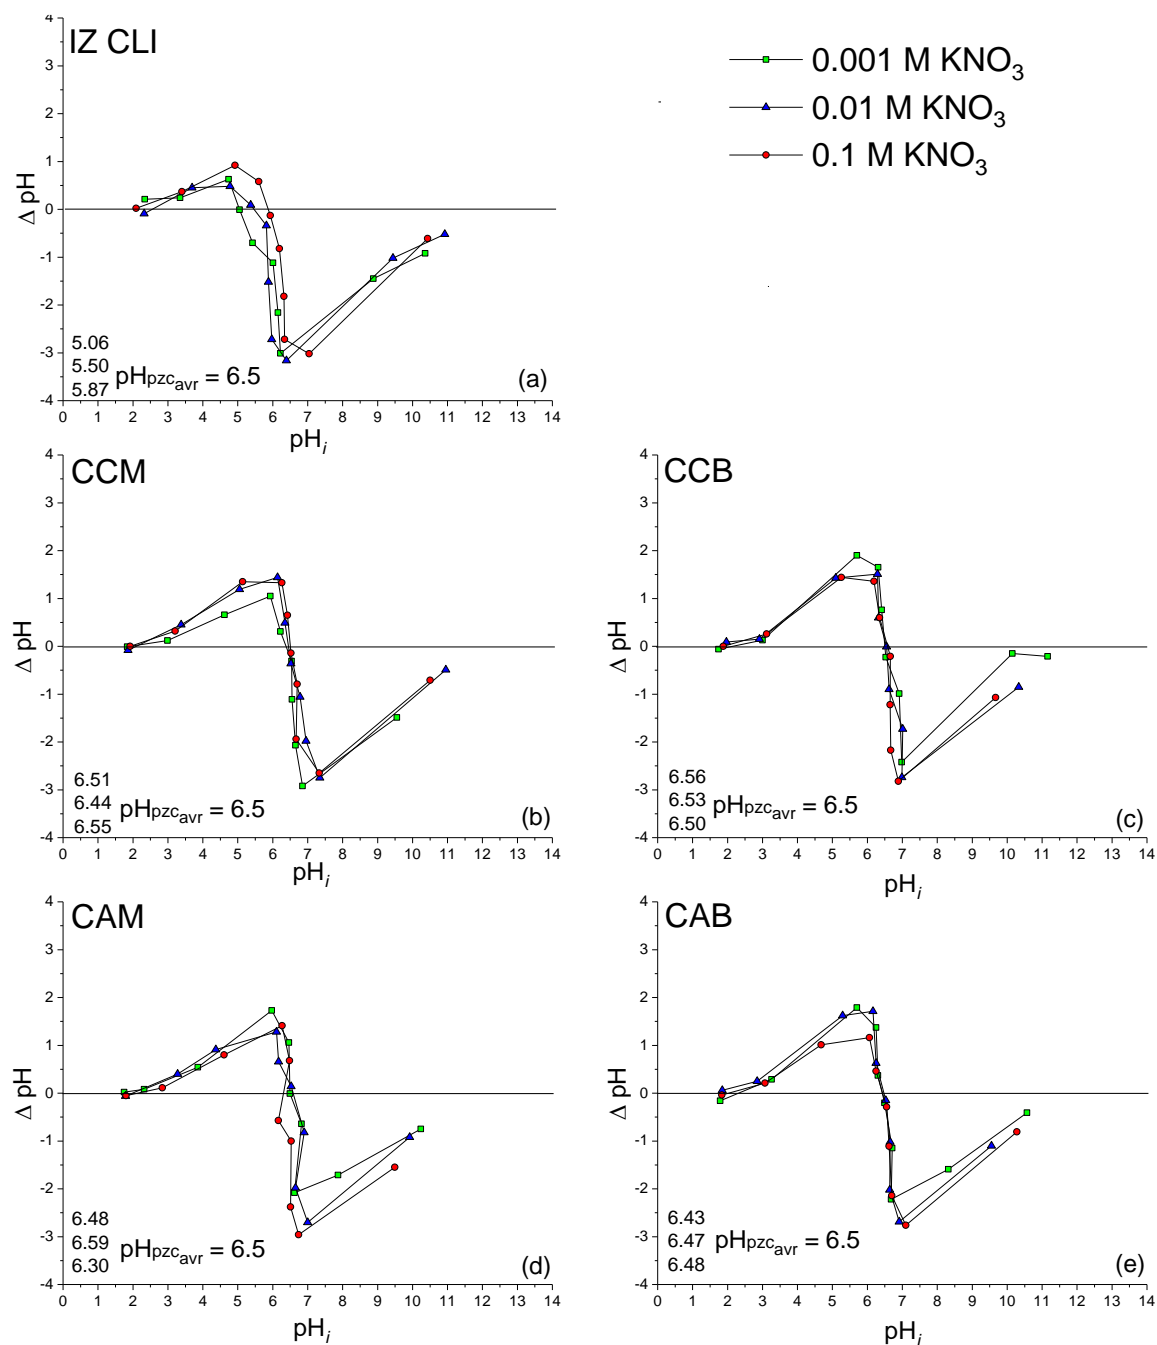

**Figure S1.**  $\Delta pH_i = f(pH_i)$  plots for: (a) starting material IZ CLI, (b) CCM, (c) CCB, (d) CAM, and (e) CAB). Experiments were carried out using three different concentrations of  $KNO_3$  (0.001 M, 0.01 M, and 0.1 M).  $pH_{pzc}$  value of each material was taken as the average value of the curves' intercept with the x-axis.

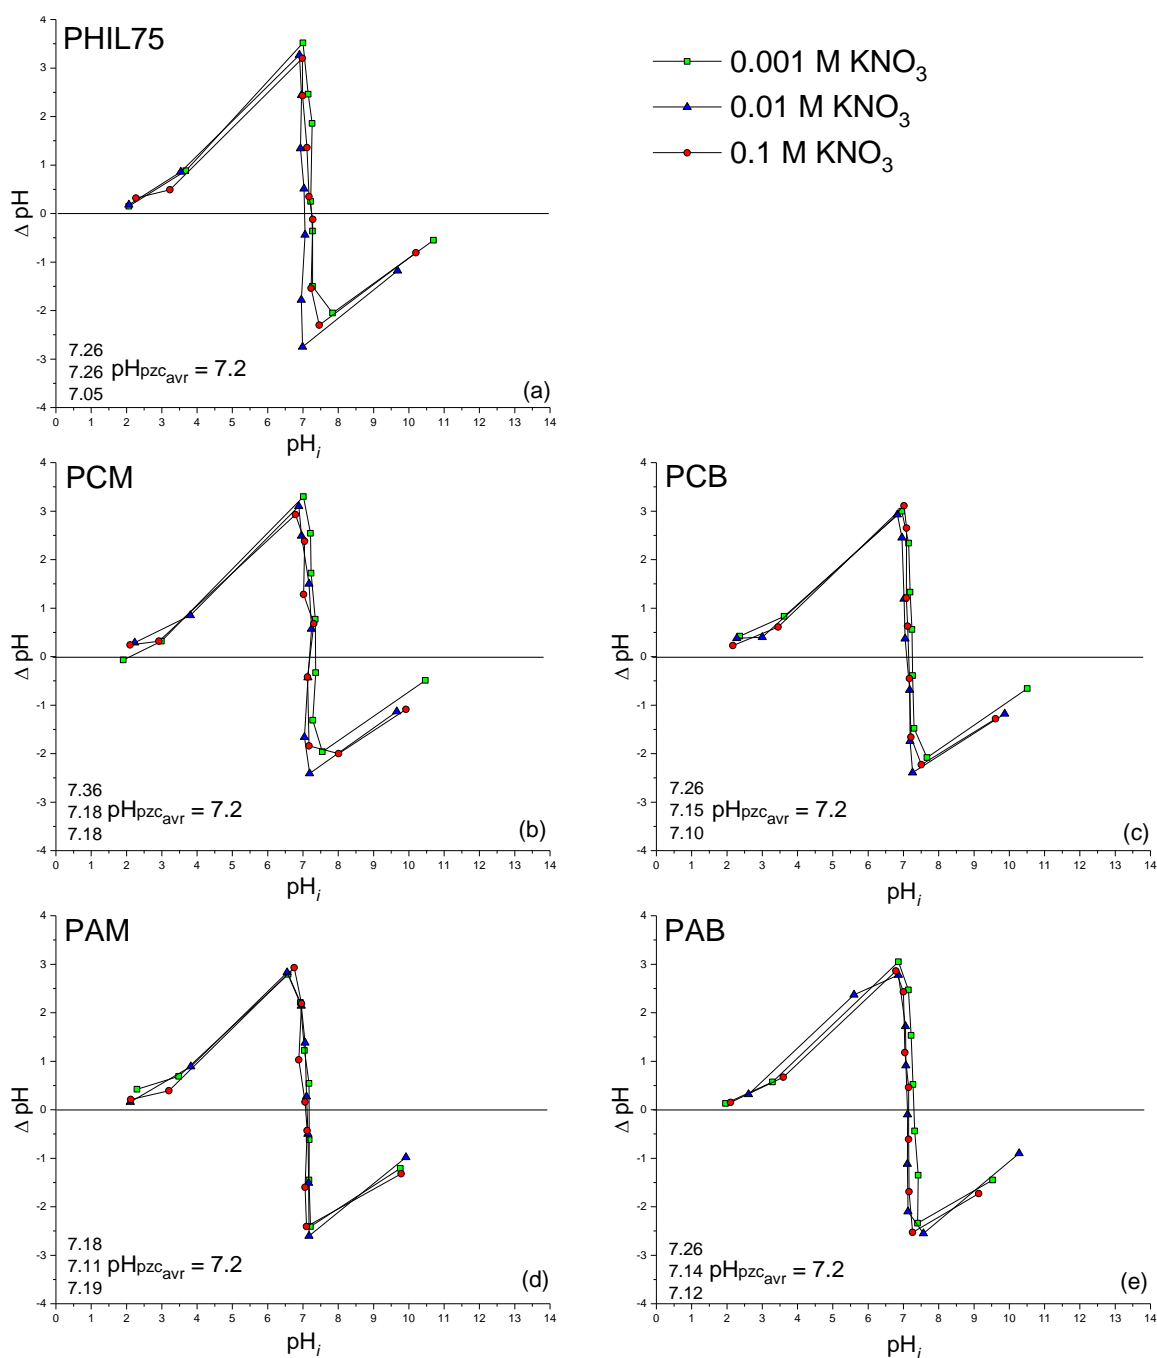

**Figure S2.**  $\Delta pH_f = f(pH_i)$  plots for: (a) starting material PHIL 75, (b) PCM, (c) PCB, (d) PAM, and (e) PAB. Experiments were carried out using three different concentrations of  $KNO_3$  (0.001 M, 0.01 M, and 0.1 M).  $pH_{pzc}$  value of each material was taken as the average value of the curves' intercept with the x-axis.
